# Supplementary material for: A novel MAPK1 variant in a family with complex psychiatric and neurodegenerative clinical phenotype
Source: Research Square preprint supplement (doi:10.21203/rs.3.rs-5881666/v1), 2025-01-24
Supplement: Supplementary file 1 [file 9195fdf6d20423469a4dfc5a.pdf]

*H.sapiens* 99 K D V Y I V Q D L M E T D L Y K L L K T Q H L S N D H I C Y F L Y Q I L R G L K Y I H S A N V L H 147  
*R.norvegicus* 97 K D V Y I V Q D L M E T D L Y K L L K T Q H L S N D H I C Y F L Y Q I L R G L K Y I H S A N V L H 145

**MAPK1 wild-type in complex with pepHePTP**

receptor's backbone RMSD

RMSD [Å]

Time [ns]

Rep1 Rep2 Rep3 Rep4 Rep5

**MAPK1<sup>Y126C</sup> in complex with pepHePTP**

receptor's backbone RMSD

RMSD [Å]

Time [ns]

Rep1 Rep2 Rep3 Rep4 Rep5

**MAPK1 wild-type in complex with pepHePTP**

peptide RMSD

RMSD [Å]

Time [ns]

Rep1 Rep2 Rep3 Rep4 Rep5

**MAPK1<sup>Y126C</sup> in complex with pepHePTP**

peptide RMSD

RMSD [Å]

Time [ns]

Rep1 Rep2 Rep3 Rep4 Rep5

**MAPK1 wild-type in complex with pepHePTP**

whole complex RMSF

RMSF [Å]

Rep1 Rep2 Rep3 Rep4 Rep5

Residue

**MAPK1<sup>Y126C</sup> in complex with pepHePTP**  
whole complex RMSF

RMSF [Å]

Rep1 Rep2 Rep3 Rep4 Rep5

Residue

A bar chart comparing the difference in free energy of binding ( $\Delta G$ ) between wild-type and Y126C variant proteins. The y-axis is labeled "kcal/mol" and ranges from -80 to 0. The x-axis shows two conditions: "wild-type" and "Y126C variant". The wild-type bar is green with a brick pattern, and the Y126C variant bar is grey with a checkerboard pattern. Both bars include error bars. A horizontal line at 0 kcal/mol serves as a reference. A bracket above the bars, marked with four asterisks (\*\*\*\*), indicates a statistically significant difference between the two groups.

| Condition     | $\Delta G$ (kcal/mol) |
|---------------|-----------------------|
| wild-type     | -51 ± 17              |
| Y126C variant | -45 ± 19              |

Figure 10: Free energy of binding ( $\Delta G$ ) of the residues in the wild-type and Y126C variant proteins. The y-axis represents  $\Delta G$  in kcal/mol, ranging from -4 to 2. The x-axis lists the residues. For each residue, two bars are shown: a green bar for the wild-type and a grey bar for the Y126C variant. Error bars represent standard deviation. A horizontal dotted line is at 0 kcal/mol.

| Residue     | Wild-type $\Delta G$ (kcal/mol) | Y126C variant $\Delta G$ (kcal/mol) |
|-------------|---------------------------------|-------------------------------------|
| Glu 79      | -0.4                            | -0.2                                |
| Leu 113     | -1.1                            | -1.0                                |
| His 123     | -0.8                            | -0.7                                |
| Tyr/Cys 126 | -2.1                            | -0.4                                |
| Tyr 129     | -0.2                            | -0.4                                |
| Leu 155     | -0.4                            | -0.4                                |
| Thr 157     | -1.9                            | -2.0                                |
| Thr 158     | -2.1                            | -2.1                                |
| Cys 159     | -2.1                            | -1.9                                |
| Asp 160     | 0.4                             | 0.2                                 |
| Gln 313     | -0.4                            | -1.2                                |
| Tyr 314     | -1.9                            | -2.5                                |
| Asp 316     | -0.4                            | -0.6                                |
| Asp 319     | -1.6                            | -0.3                                |
